# Supplementary material for: Sarcopenia Is a Negative Prognostic Factor in Patients Undergoing Transarterial Chemoembolization (TACE) for Hepatic Malignancies
Source: PubMed Central journal article supplement (PMC6827165; doi:10.3390/cancers11101503), 2019-10-08
Supplement: cancers-11-01503-s001.pdf [file cancers-11-01503-s001.pdf]

## Supplementary Materials: Sarcopenia Is a Negative Prognostic Factor in Patients Undergoing Transarterial Chemoembolization (TACE) for Hepatic Malignancies

Sven H. Loosen, Maximilian Schulze-Hagen, Philipp Bruners, Frank Tacke, Christian Trautwein, Christiane Kuhl, Tom Luedde and Christoph Roderburg

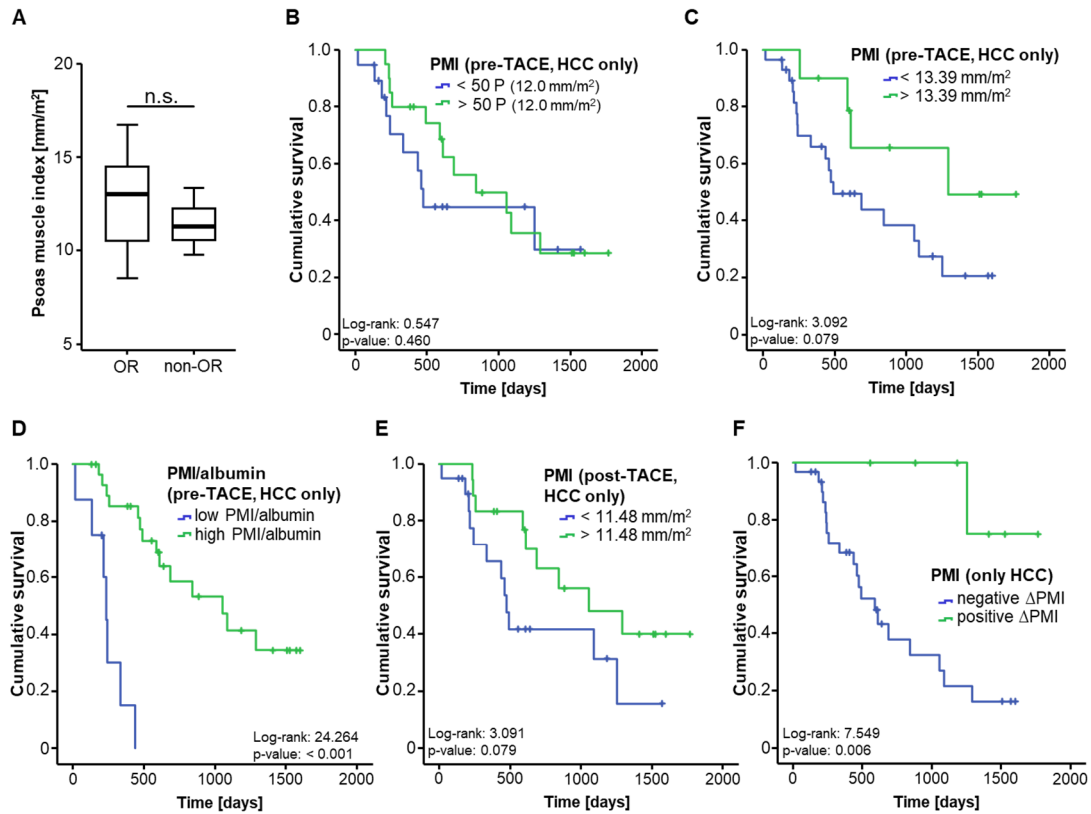

**Figure S1.** Evaluation of the PMI in HCC patients only ( $n = 46$ ). (A) Patients who showed an objective response (OR) to TACE therapy have a similar PMI compared to non-responding (non-OR) patients. (B) HCC patients with a pre-interventional PMI below the 50th percentile show a trend towards an impaired prognosis. (C) Kaplan-Meier curve analysis shows a strong trend towards a reduced overall survival for sarcopenic patients with a pre-interventional PMI below 13.39 mm/m<sup>2</sup>. (D) HCC patients with a low combined PMI\*albumin score show a strikingly reduced overall survival. (E) Patients with a post-interventional PMI below the ideal cut-off value (11.48 mm/m<sup>2</sup>) show a strong trend towards an impaired long-term survival following TACE therapy. (F) HCC patients with progressive sarcopenia after TACE (negative  $\Delta$ PMI) show a significantly reduced overall survival compared to patients with a reduced level of sarcopenia after therapy (positive  $\Delta$ PMI).

**Table S1.** Correlation analysis between the PMI and variant laboratory markers.

| Parameter                  | Psoas Muscle Index (PMI) |         |
|----------------------------|--------------------------|---------|
|                            | r                        | p-value |
| Age                        | 0.122                    | 0.390   |
| Size of target lesion      | 0.211                    | 0.174   |
| Charlson Comorbidity Index | -0.040                   | 0.815   |
| Sodium                     | 0.193                    | 0.190   |
| Potassium                  | -0.039                   | 0.791   |
| Leukocytes                 | -0.035                   | 0.808   |
| Thrombocytes               | -0.075                   | 0.604   |
| INR                        | 0.201                    | 0.167   |

|         |        |       |
|---------|--------|-------|
| AST     | 0.009  | 0.963 |
| ALT     | 0.132  | 0.404 |
| LDH     | 0.225  | 0.174 |
| GGT     | -0.008 | 0.956 |
| ALP     | -0.081 | 0.584 |
| CRP     | -0.101 | 0.501 |
| Albumin | 0.196  | 0.182 |

---

INR: International Normalized Ratio, AST: aspartate transaminase, ALT: alanine transaminase, LDH: lactate dehydrogenase, GGT:  $\gamma$ -Glutamyl transpeptidase, ALP: alkaline phosphatase, CRP: C-reactive protein, r: Pearson correlation coefficient.
